# Supplementary material
Source: Elsevier journal article supplement (https://www.sciencedirect.com/science/article/pii/S0212656720303309)
Supplement: mmc1 [file S0212656720303309:mmc1.docx]

**MATERIAL SUPLEMENTARIO. Cuestionario toma de decisión informada de mamografía**

**Conocimiento sobre la mamografía**

| Q1. ¿Qué es la mamografía? | |
| --- | --- |
|  | 1. Un examen que se realiza cuando estás sana |
|  | 1. Un examen que se realiza si notas algún cambio o bulto en tu mama (pecho) |

| Q2. ¿Crees que la mamografía previene el cáncer de mama? | |
| --- | --- |
|  | 1. Sí |
|  | 1. No |

| Q3. ¿Crees que la mamografía detecta siempre el cáncer de mama? | |
| --- | --- |
|  | 1. Sí |
|  | 1. No |

| Q4. ¿Todas las mujeres con un resultado alterado de mamografía tienen cáncer de mama? | |
| --- | --- |
|  | 1. Sí |
|  | 1. No |

| Q5. ¿Quién crees que es más probable que muera de cáncer de mama? | |
| --- | --- |
|  | 1. Una mujer que se realiza la mamografía |
|  | 1. Una mujer que no se realiza la mamografía |

| Q6. ¿Quién crees que es más probable que sea diagnosticada con cáncer de mama? | |
| --- | --- |
|  | 1. Una mujer que se realiza la mamografía |
|  | 1. Una mujer que no se realiza la mamografía |

A continuación te leeré algunas afirmaciones sobre la mamografía. Te pido que me digas si es verdadera o falsa

| Q7. Todo cáncer de mama puede eventualmente causar enfermedad y muerte si no es detectado y tratado | |
| --- | --- |
|  | 1. Verdadero |
|  | 1. Falso |

| Q8. Cuando la mamografía detecta cáncer de mama, los médicos pueden predecir de manera confiable si el cáncer provocará daño a la mujer | |
| --- | --- |
|  | 1. Verdadero |
|  | 1. Falso |

| Q9. Todo cáncer de mama puede ser tratado | |
| --- | --- |
|  | 1. Verdadero |
|  | 1. Falso |

| Q10. La mamografía puede provocar que algunas mujeres con cáncer de mama inofensivo reciban tratamiento innecesario | |
| --- | --- |
|  | 1. Verdadero |
|  | 1. Falso |

| Q11. La mamografía detecta cánceres inofensivos más frecuentemente que lo que previene muertes por cáncer | |
| --- | --- |
|  | 1. Verdadero |
|  | 1. Falso |

| Q12. ¿Cuál de estas afirmaciones describe de mejor manera el sobre-diagnóstico? | |
| --- | --- |
|  | 1. El examen detecta un cáncer que nunca causaría problemas a la persona |
|  | 1. El examen detecta una anormalidad que otros exámenes demuestran que no es cáncer |

Para las siguientes preguntas, me gustaría que te imaginaras a 1,000 mujeres normales que tienen 50 años

| Q13. Si esas 1,000 mujeres se realizan una mamografía cada 2 años por 20 años, en ese tiempo ¿cuántas mujeres crees que no morirán de cáncer de mama gracias a la mamografía? |
| --- |
| Respuesta: |

| Q14. Si esas 1,000 mujeres se realizan una mamografía cada 2 años por 20 años, ¿Cuántas crees que morirán de todos modos por cáncer de mama en ese tiempo? |
| --- |
| Respuesta: |

| Q15. Si esas 1,000 mujeres se realizan una mamografía cada 2 años por 20 años, ¿cuántas serán diagnosticadas y tratadas por un cáncer de mama inofensivo ? |
| --- |
| Respuesta: |

| Q16. Si esas 1,000 mujeres se realizan una mamografía cada 2 años por 20 años, ¿cuántas tendrán un resultado anormal de la mamografía, pero al realizarse otros exámenes se descubriría que NO tienen cáncer? |
| --- |
| Respuesta: |

**Actitud hacia la Mamografía**

Para las siguientes preguntas encierra en un círculo el número de 1 a 7 que mejor describa cómo te sientes en este momento

1) Para mí, realizarme la mamografía sería

| Beneficioso | 1 | 2 | 3 | 4 | 5 | 6 | 7 | No beneficioso |
| --- | --- | --- | --- | --- | --- | --- | --- | --- |

2) Para mí, realizarme la mamografía sería

| Dañino | 1 | 2 | 3 | 4 | 5 | 6 | 7 | No dañino |
| --- | --- | --- | --- | --- | --- | --- | --- | --- |

3) Para mí, realizarme la mamografía sería

| Algo bueno | 1 | 2 | 3 | 4 | 5 | 6 | 7 | Algo no bueno |
| --- | --- | --- | --- | --- | --- | --- | --- | --- |

4) Para mí, realizarme la mamografía

| Valdría la pena | 1 | 2 | 3 | 4 | 5 | 6 | 7 | No valdría la pena |
| --- | --- | --- | --- | --- | --- | --- | --- | --- |

5) Para mí, realizarme la mamografía sería

| Importante | 1 | 2 | 3 | 4 | 5 | 6 | 7 | No importante |
| --- | --- | --- | --- | --- | --- | --- | --- | --- |

**Intención de realizarse la mamografía**

Pensando en tu decisión de realizarte la mamografía en los próximos dos o tres años, marca tu respuesta:

|  | Definitivamente me realizaré el examen |
| --- | --- |
|  | Es probable que me realice el examen |
|  | No estoy segura |
|  | Es probable que no me realice el examen |
|  | Definitivamente no me realizaré el examen |
